# Supplementary material for: Genetic and environmental contributions to gaze lateralization across social and non-social stimuli in human infants
Source: PubMed Central journal article supplement (PMC10864339; doi:10.1038/s41598-024-54373-6), 2024-02-14
Supplement: 41598_2024_54373_MOESM1_ESM.pdf [file 41598_2024_54373_MOESM1_ESM.pdf]

# Supplementary Information

## **Genetic and environmental contributions to gaze lateralization across social and non-social stimuli in human infants**

Authors: Charlotte Viktorsson<sup>1\*</sup>, Ana Maria Portugal<sup>1,2</sup>, Terje Falck-Ytter<sup>1,2</sup>

<sup>1</sup>Development and Neurodiversity Lab, Department of Psychology, Uppsala University; Uppsala, Sweden

<sup>2</sup>Center of Neurodevelopmental Disorders (KIND), Division of Neuropsychiatry, Department of Women's and Children's Health, Karolinska Institutet; Stockholm, Sweden

\*Corresponding author. Email: [charlotte.viktorsson@psyk.uu.se](mailto:charlotte.viktorsson@psyk.uu.se)

**Supplementary Information S1.** Gaze lateralization for the lower part of the face.

When analyzing data from only the lower part of the face (**Figure 1**), a significant right gaze bias was found (mean = .391,  $t(551) = -12.0$ ,  $p < .001$ , Cohen's  $d = .51$ ).

There were no statistically significant associations between gaze lateralization at five months and concurrent general development ( $\beta = -.05$ , 95% CI:  $-.03; .14$ ,  $p = .226$ ), socio-communicative abilities at 14 months ( $\beta = <-.01$ , 95% CI:  $-.13; .09$ ,  $p = .707$ ), or language comprehension at 14 months ( $\beta = .01$ , 95% CI:  $-.09; .11$ ,  $p = .858$ ). Likewise, autistic traits at 36 months was not related to gaze lateralization ( $\beta = <.01$ , 95% CI:  $-.09; .12$ ,  $p = .792$ ) and neither was vocabulary at 36 months ( $\beta = -.07$ , 95% CI:  $-.19; .06$ ,  $p = .273$ ).

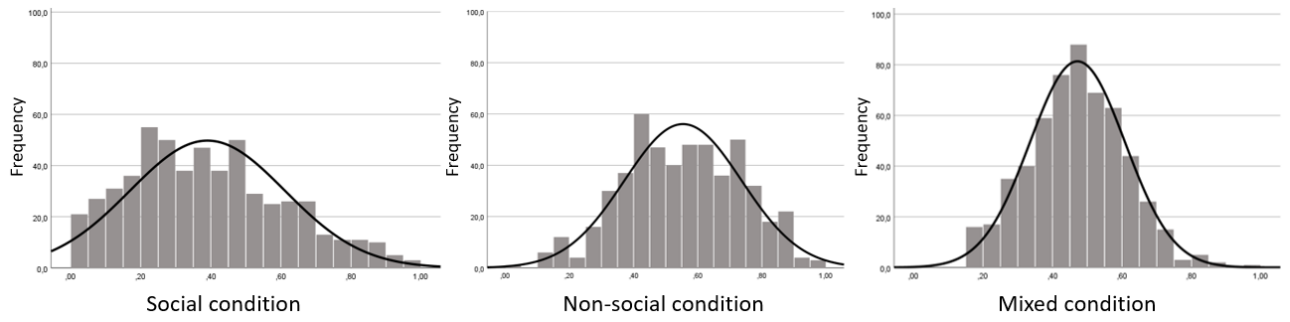

**Figure S1.** Distributional plots of the Social condition, Non-social condition, and Mixed condition.

## Testing covariates and assumptions

| <b>Social condition</b> |             |                     |           |            | <b>Comparative fit with saturated model</b> |                               |          |
|-------------------------|-------------|---------------------|-----------|------------|---------------------------------------------|-------------------------------|----------|
| <b>Model</b>            | <b>-2LL</b> | <b># parameters</b> | <b>df</b> | <b>AIC</b> | <b><math>\Delta \chi^2</math></b>           | <b><math>\Delta</math> df</b> | <b>p</b> |
| Fully sat.              | -132.85     | 12                  | 538       | -108.86    | -                                           | -                             | -        |
| Submodel 1              | -131.71     | 10                  | 540       | -111.71    | 1.14                                        | 2                             | 0.56     |
| Submodel 2              | -127.59     | 8                   | 542       | -111.59    | 5.27                                        | 4                             | 0.26     |
| Submodel 3              | -126.84     | 7                   | 543       | -112.84    | 6.02                                        | 5                             | 0.30     |
| Submodel 4              | -126.71     | 6                   | 544       | -114.71    | 6.15                                        | 6                             | 0.41     |
| Age                     | -131.86     | 11                  | 539       | -109.86    | 1.00                                        | 1                             | 0.32     |
| Sex                     | -132.54     | 11                  | 539       | -110.54    | 0.32                                        | 1                             | 0.57     |

  

| <b>Non-social condition</b> |             |                     |           |            | <b>Comparative fit with saturated model</b> |                               |          |
|-----------------------------|-------------|---------------------|-----------|------------|---------------------------------------------|-------------------------------|----------|
| <b>Model</b>                | <b>-2LL</b> | <b># parameters</b> | <b>df</b> | <b>AIC</b> | <b><math>\Delta \chi^2</math></b>           | <b><math>\Delta</math> df</b> | <b>p</b> |
| Fully sat.                  | 4415.20     | 12                  | 500       | 4439.20    | -                                           | -                             | -        |
| Submodel 1                  | 4416.18     | 10                  | 502       | 4436.18    | 0.98                                        | 2                             | 0.61     |
| Submodel 2                  | 4418.56     | 8                   | 504       | 4434.56    | 3.36                                        | 4                             | 0.50     |
| Submodel 3                  | 4418.56     | 7                   | 505       | 4432.56    | 3.36                                        | 5                             | 0.64     |
| Submodel 4                  | 4421.46     | 6                   | 506       | 4433.46    | 6.26                                        | 6                             | 0.39     |
| Age                         | 4415.61     | 11                  | 500       | 4437.61    | 0.40                                        | 1                             | 0.53     |
| Sex                         | 4415.61     | 11                  | 501       | 4437.61    | 0.41                                        | 1                             | 0.52     |

  

| <b>Mixed condition</b> |             |                     |           |            | <b>Comparative fit with saturated model</b> |                               |          |
|------------------------|-------------|---------------------|-----------|------------|---------------------------------------------|-------------------------------|----------|
| <b>Model</b>           | <b>-2LL</b> | <b># parameters</b> | <b>df</b> | <b>AIC</b> | <b><math>\Delta \chi^2</math></b>           | <b><math>\Delta</math> df</b> | <b>p</b> |
| Fully sat.             | -645.13     | 12                  | 545       | -621.13    | -                                           | -                             | -        |
| Submodel 1             | -644.29     | 10                  | 547       | -624.29    | 0.84                                        | 2                             | 0.66     |
| Submodel 2             | -643.69     | 8                   | 549       | -627.69    | 1.45                                        | 4                             | 0.84     |
| Submodel 3             | -643.69     | 7                   | 550       | -629.69    | 1.45                                        | 5                             | 0.92     |
| Submodel 4             | -640.92     | 6                   | 551       | -628.92    | 4.21                                        | 6                             | 0.65     |
| Age                    | -643.93     | 11                  | 546       | -621.93    | 1.20                                        | 1                             | 0.27     |
| Sex                    | -644.19     | 11                  | 546       | -622.19    | 0.95                                        | 1                             | 0.33     |

**Table S1.** The fully saturated model is the baseline model, which models the means and variances separately for each twin in a pair and across zygosity.

Submodel 1: Equating means across twins within a pair

Submodel 2: Equating means across zygosity

Submodel 3: Equating variances across twins within a pair

Submodel 4: Equating variances across zygosity

Age: Testing the significance of age

Sex: Testing the significance of sex

-2LL: Fit statistic, the lower the better fitting is the model

df: Degrees of freedom

AIC: An alternative fit index, lower value denotes better model fit

$\Delta \chi^2$ : Difference in -2LL statistic between two models, distributed  $\chi^2$

$\Delta$  df: Difference in degrees of freedom between two models
